large shearing stress at the coating/substrate interface, leading toward delamination of the coating.

## Acknowledgment

The paper is part of the work performed under ONR Grant No. ONR-N00014-84-K-0252. Dr. A. William Ruff and Dr. Marshall B. Peterson are the program managers.

## References

- Archard, J. F., "The Temperature of Rubbing Surface," *Wear*, Vol. 2, No. 6, 1959, pp. 438-455.
- Bannerjee, B. N., and Burton, R. A., "Experimental Studies of Thermoelastic Effects in Hydrodynamically Lubricated Face Seals," *ASME JOURNAL OF LUBRICATION TECHNOLOGY*, Vol. 101, 1979, pp. 275-282.
- Chen, T. Y., and Ju, F. D., "Thermal Effects in a Coated Medium (with a Cavity) Due to Friction Heating by a Passing Asperity," *ASME JOURNAL OF TRIBOLOGY*, Vol. 30, 1987, pp. 427-435.
- Chen, T. Y., and Ju, F. D., "Thermomechanical Cracking in the Vicinity of a Near-Surface Void Due to High-Speed Friction Load," *ASME JOURNAL OF TRIBOLOGY*, Vol. 110, 1988, pp. 306-312.
- Huang, J. H., and Ju, F. D., "Thermomechanical Cracking Due to Moving Friction Load," Part I, II, & III, *Wear*, Vol. 102, 1985, pp. 81-104.
- Ju, F. D., and Huang, J. H., "Heat Checking in a Contact Zone of a Bearing Seal (A Two-Dimensional Model of a Single Moving Asperity)," *Wear*, Vol. 79, 1982, pp. 107-118.
- Ju, F. D., and Chen, T. Y., "Thermomechanical Cracking in Layered Media from Moving Friction Load," *ASME JOURNAL OF TRIBOLOGY*, Oct. 1984, pp. 513-518.
- Ju, F. D., and Liu, J. C., "Effect of Peclet Number in Thermo-Mechanical Cracking Due to High-Speed Friction Load," *ASME JOURNAL OF TRIBOLOGY*, Vol. 110, 1988a, pp. 217-221.
- Ju, F. D., and Liu, J. C., "Parametric Affecting Thermo-Mechanical Cracking in Coated Media Due to High-Speed Friction Load," *ASME JOURNAL OF TRIBOLOGY*, Vol. 110, 1988, pp. 222-227.
- Kennedy, F. E., "Surface Temperature in Sliding System - A Finite Element Analysis," *ASME JOURNAL OF LUBRICATION TECHNOLOGY*, Vol. 103, 1981, pp. 90-96.
- Kennedy, F. E., and Karper, S. A., "Thermocracking of a Mechanical Face Seal," *Wear*, Vol. 79, 1982, pp. 21-36.
- Kennedy, F. E., Grim, J. N., and Glovsky, R. P., "Factors Influencing Thermo-mechanical Failure of Face Seals," II, *Interim Report No. 2 (ONR Contact No. N00014-81-k-0090)*, Jan. 1983.
- Kennedy, F. E., and Grim, J. N., "Observation of Contact Conditions in Mechanical Face Seals," *ASLE Trans.*, Vol. 27, 1984a, pp. 122-128.
- Kennedy, F. E., Grim, J. N., and Chuah, C. K., "An Experimental/Theoretical Study of Contact Phenomena in Mechanical Face Seals," *Developments in Numerical and Experimental Methods Applied to Tribology*, 1984b, pp. 285-291.
- Ling, F. F., and Mow, V. C., "Surface Displacement of a Convective Elastic Half-Space Under an Arbitrarily Distributed Fast-Moving Heat Source," *Journal of Basic Engineering*, Sept. 1965, pp. 729-734.
- Ling, F. F., *Surface Mechanics*, Wiley, 1973.
- Liu, J. C., "The Parametric Effects in Thermo-Mechanical Cracking in Coated Media Due to High Speed Asperity Excitation," Master Thesis, University of New Mexico, Dec. 1986.
- Mow, V. C., and Cheng, H. S., "Thermal Stresses in an Elastic Half-Space Associated with an Arbitrarily Distributed Moving Heat Source," *Z. Angew. Math. Phys.*, Vol. 18, 1967, pp. 500-507.
- Sih, G. C., "On the Singular Character of Thermal Stresses Near a Crack Tip," *ASME Journal of Applied Mechanics*, Vol. 29, Sept. 1962, pp. 587-589.

Williams, M. L., "Stress Singularities Resulting from Various Boundary Conditions in Angular Corners of Plates in Extension," *ASME Journal of Applied Mechanics*, Dec. 1952, pp. 526-528.

## APPENDIX

$$A_1 = [N_2(i-1, j) + N_3(i, j-1)] / (4\xi_\xi \eta_\eta), \quad (17)$$

$$A_2 = N_1\left(i - \frac{1}{2}, j\right) / \xi_\xi^2 + N_1(i, j) \cdot \xi_\xi \xi_\xi / (2\xi_\xi^3), \quad (18)$$

$$A_3 = -[N_2(i-1, j) + N_3(i, j+1)] / (4\xi_\xi \eta_\eta), \quad (19)$$

$$A_4 = N_3\left(i, j - \frac{1}{2}\right) / \eta_\eta^2 + N_3(i, j) \cdot \eta_\eta \eta_\eta / (2\eta_\eta^3), \quad (20)$$

$$A_5 = -\left\{ \left[ N_1\left(i + \frac{1}{2}, j\right) + N_1\left(i - \frac{1}{2}, j\right) \right] / \xi_\xi^2 + \left[ N_3\left(i, j + \frac{1}{2}\right) + N_3\left(i, j - \frac{1}{2}\right) \right] / \eta_\eta^2 \right\}, \quad (21)$$

$$A_6 = N_3\left(i, j + \frac{1}{2}\right) / \eta_\eta^2 - N_3(i, j) \eta_\eta \eta_\eta / (2\eta_\eta^3), \quad (22)$$

$$A_7 = -[N_2(i+1, j) + N_3(i, j-1)] / (4\xi_\xi \eta_\eta), \quad (23)$$

$$A_8 = N_1\left(i + \frac{1}{2}, j\right) / \xi_\xi^2 - N_1(i, j) \cdot \xi_\xi \xi_\xi / (2\xi_\xi^3), \quad (24)$$

$$A_9 = [N_2(i+1, j) + N_3(i, j+1)] / (4\xi_\xi \eta_\eta), \quad (25)$$

$$B_1 = [N_2(i, j-1) + N_3(i-1, j)] / (4\xi_\xi \eta_\eta), \quad (26)$$

$$B_2 = N_3\left(i - \frac{1}{2}, j\right) / \xi_\xi^2 + N_3(i, j) \cdot \xi_\xi \xi_\xi / (2\xi_\xi^3), \quad (27)$$

$$B_3 = -[N_2(i, j+1) + N_3(i-1, j)] / (4\xi_\xi \eta_\eta), \quad (28)$$

$$B_4 = N_1\left(i, j - \frac{1}{2}\right) / \eta_\eta^2 + N_1(i, j) \cdot \eta_\eta \eta_\eta / (2\eta_\eta^3), \quad (29)$$

$$B_5 = -\left\{ \left[ N_3\left(i - \frac{1}{2}, j\right) + N_3\left(i + \frac{1}{2}, j\right) \right] / \xi_\xi^2 + \left[ N_1\left(i, j + \frac{1}{2}\right) + N_1\left(i, j - \frac{1}{2}\right) \right] / \eta_\eta^2 \right\}, \quad (30)$$

$$B_6 = N_1\left(i, j + \frac{1}{2}\right) / \eta_\eta^2 - N_1(i, j) \eta_\eta \eta_\eta / (2\eta_\eta^3), \quad (31)$$

$$B_7 = -[N_2(i, j-1) + N_3(i+1, j)] / (4\xi_\xi \eta_\eta), \quad (32)$$

$$B_8 = N_3\left(i + \frac{1}{2}, j\right) / \xi_\xi^2 - N_3(i, j) \cdot \xi_\xi \xi_\xi / (2\xi_\xi^3), \quad (33)$$

$$B_9 = [N_2(i, j+1) + N_3(i+1, j)] / (4\xi_\xi \eta_\eta), \quad (34)$$

where  $\xi$  and  $\eta$  are the coordinates of the transformed plane.

## DISCUSSION

### F. F. Ling<sup>1</sup>

Once again, Professor Ju and his proteges have extended their interesting and useful series of solutions of problems in surface mechanics. In recent years they have tackled the problem set of thermal mechanical effects due to moving load; moreover, these problem sets include layer media and cavities.

One of the authors' conclusions, (iii), is "for the same Peclet number ( $R_1$ ), the critical ligament thickness ( $L_{cr}$ ) is smaller than the critical depth ( $\eta_{cr}$ ) of a coating material. This coincides with this discussor's intuition. Their conclusion (ii)

seems to be a redundant one. Conclusion (ii) states "the location of the cavity influences thermal stress, which reaches a maximum, . . . , at the critical ligament thickness of  $L_c = 0.094$  for both cases of a single material with a cavity and a layer medium with a cavity." First of all, the authors are talking about same material for the single as well as the layer material. Earlier on in the paper, the author wrote ". . . maximum tensile thermal stress in the case of a single material with a rectangular cavity is much higher . . . the occurrence of the maximum tensile stress is at the trailing corner of the cavity, which defines a critical thickness  $L_{cr}$  . . . ." As such the single material with a cavity and the layer medium with a cavity is one and the same.

<sup>1</sup>Columbia University, New York, NY.

### Authors' Closure

Professor Ling's observation is very much to the point. We are grateful to have the opportunity to clarify some points which we should have done so in the main text. The critical ligament thickness is indeed intuitively apparent to be smaller than the critical depth of the coating material. The paper did quantify the critical ligament thickness through a numerical extremizing process as shown in Fig. 4. The relationship can be expressed algebraically as:

$$R(L_{cr})^{1.83} = 17.53,$$

where  $R$  is the Peclet Number and  $L_{cr}$  is the critical ligament thickness. The authors agree that the conclusion in (ii) could have been included in (iii). As for the critical depth and the critical ligament thickness, both are characteristics of the coating material as a single material. However their effect on the thermo-mechanical field in a coated medium is very significant, if the coating thickness is in the neighborhood of the critical ligament thickness as demonstrated in Fig. 7. In the figure the same coating material, with changes in stiffness, is shown to result in much higher thermal principal stress than the case of single materials.
